# Supplementary material for: Supercritical CO2 Extraction of Fatty Acids, Phytosterols, and Volatiles from Myrtle (Myrtus communis L.) Fruit
Source: MDPI journal article supplement (doi:10.3390/molecules29081755), 2024-04-12
Supplement: s1 [file s1]

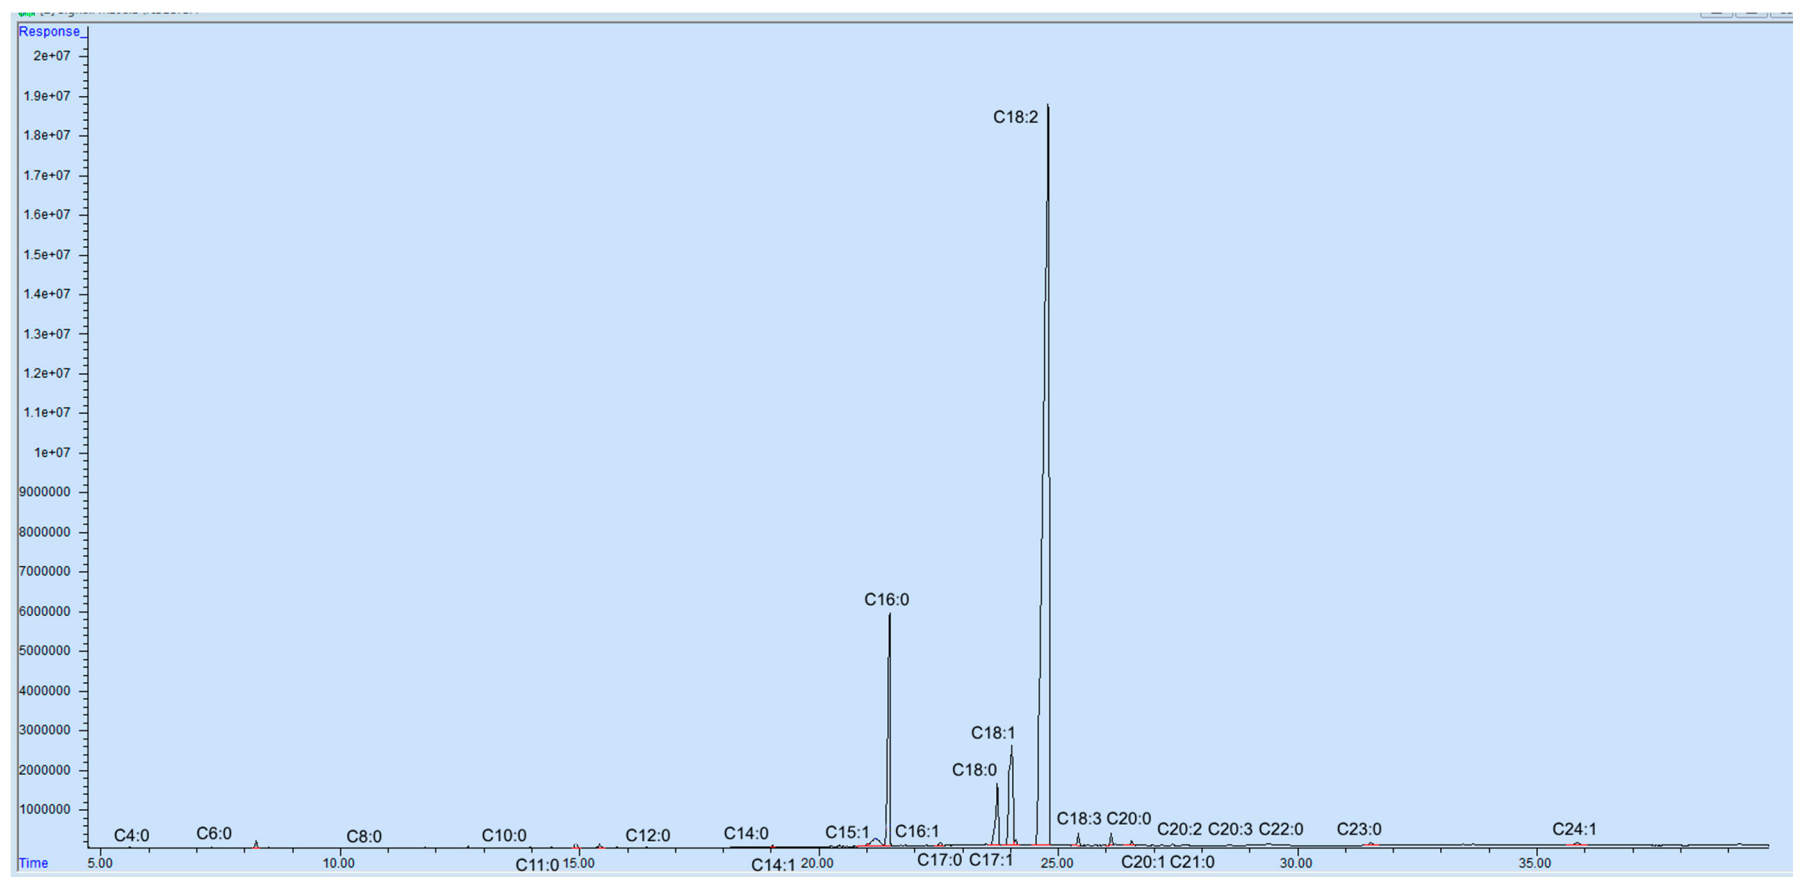

Figure S1. Chromatogram of fatty acids in supercritical CO<sub>2</sub> extract of myrtle fruit

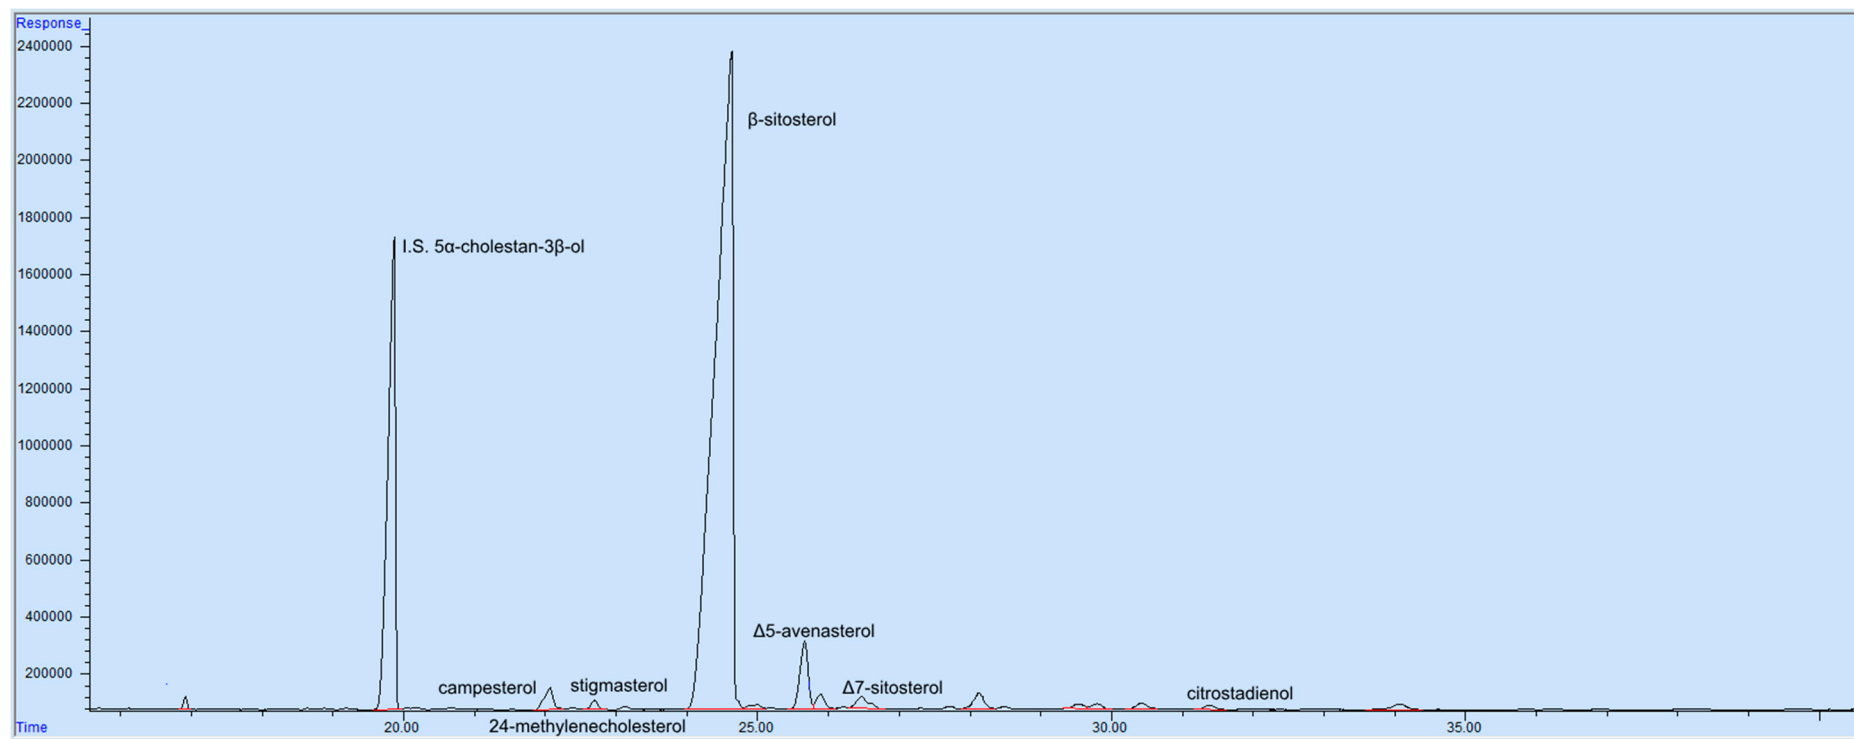

Figure S2. Chromatogram of phytosterols in supercritical CO<sub>2</sub> extract of myrtle fruit

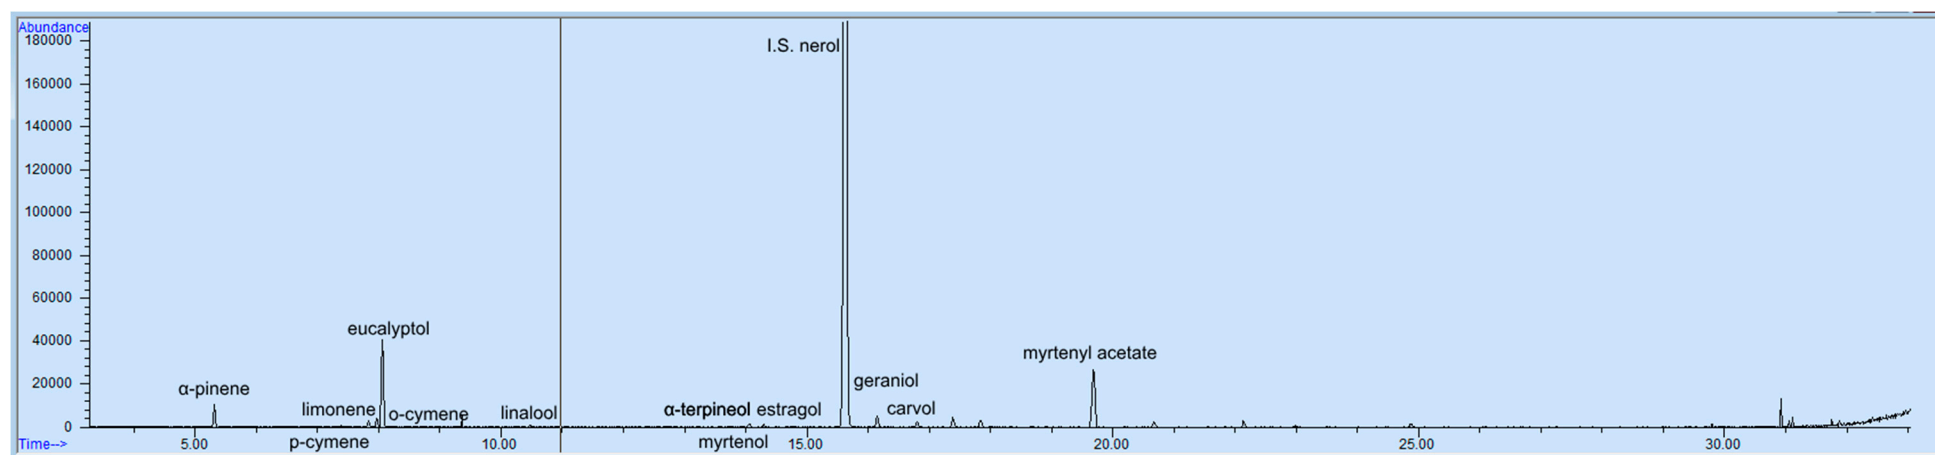

Figure S3. Chromatogram of volatile compounds in supercritical CO<sub>2</sub> extract of myrtle fruit
